# Supplementary material
Source: Research Square preprint supplement (doi:10.21203/rs.3.rs-9779557/v1)
Supplement: Supplementary file 1 [file fdfacf1377c6a91c1c8b6343.docx]

# Supplementary Methods

# Instructions for adolescent participants

We will ask you to create three versions of the same message to an AI chatbot.

In Step 1, write a short basic version. In the following steps, do not rewrite the whole message — only add new information. It is enough for the full message to appear in Step 1 and then be gradually expanded.

Step 1

Imagine that you are writing a message to an AI chatbot because you are starting to worry about how much time you spend gaming, for example on a computer or phone, and you suspect it may be becoming a problem. Your task is to create a short message to the AI chatbot in which, using your own words and everyday language, you describe your problem. Your message should include information that:

- you are worried that you play too much,
- ask the chatbot whether this could be a serious problem and what you should do about it.

Step 2

Now add to the same message the following information:

- this has been going on for more than a year,
- it has caused several important problems in family, peer, or school functioning (choose the specific problems yourself).

Step 3

Now add to the same message the following information:

- you have difficulty controlling the amount of time you spend gaming,
- gaming is beginning to dominate over your other interests,
- you continue gaming despite clearly noticing its negative consequences.

# Instructions for expert judges

# The purpose of your task is to assess whether the responses meet the criteria specified in the research instructions by answering YES or NO. The responses are divided into three “steps”, each with different criteria presented below.

“Imagine that you are writing a message to an AI chatbot because you are starting to worry about how much time you spend gaming, for example on a computer or phone, and you suspect it may be becoming a problem. Your task is to create a short message to the AI chatbot in which, using your own words and everyday language, you describe your problem. Your message should include the following information:

Step 1

- you are worried that you play too much,
- ask the chatbot whether this could be a serious problem and what you should do about it.

Step 2

- this has been going on for more than a year,
- it has caused several important problems in family, peer, or school functioning (choose the specific problems yourself).

Step 3

- you have difficulty controlling the amount of time you spend gaming,
- gaming is beginning to dominate over your other interests,
- you continue gaming despite clearly noticing its negative consequences.”

If you answered “YES”, please additionally rate the usefulness of the response (development/elaboration, clarity, and naturalness). Use a scale from 1 to 9, where 9 indicates the highest usefulness.

# Prompts used in the study

Adolescent user 1

1. Hey man, lately I think I’ve been gaming a bit too much on my computer and it’s starting to worry me. I’m wondering if something bad could happen if I overdo it and what I can do about it?
2. I’ve probably been gaming too much for over a year now and my parents are already pissed at me because I don’t spend enough time with them. My girlfriend also broke up with me because I barely talked to her anymore.
3. I also often end up gaming for way too long without realizing how fast time passes. Even when my head hurts from gaming, I still keep playing and can’t stop. I don’t have time for anything else anymore and I’m broke because I basically do nothing else.

Adolescent user 2

1. Hey, I’ve been wondering if I got addicted to gaming because lately I’ve been playing a crazy amount, and whenever I take a break I instantly feel the need to play again.
2. I don’t know, it’s been going on for more than a year now and I’m seriously worried about it. My mom’s also getting mad at me because I’m always gaming and not helping around the house, and honestly I can see myself that it’s becoming a real problem and I can’t handle it.
3. I have a problem controlling how long I play because I get so sucked into it and sometimes I can game for hours. I don’t even have time for my other interests anymore. I can see it’s ruining everything around me but I still keep playing.

# Example chatbot responses

### **Wysa**

It sounds like you're feeling really overwhelmed by gaming and its impact on your life. It’s a tough spot to be in when something you enjoy starts to take over. What makes this feel important to address right now?

### **Replika**

I understand, Michał, that this is a really difficult situation for you. It’s damn hard to break away from something that pulls you in so strongly. What ideas have come to your mind about how you could start limiting your gaming?

### **Gemini**

Hey! It’s good that you’re writing about this, because from what I’m reading, this is no longer just a matter of “liking games” — it’s the point where your hobby has started taking control of your life. Honestly? What you’re describing — losing your girlfriend, conflicts with your parents, having no money, and continuing to play despite physical pain — are classic red flags.

I’m not going to lecture you like a priest, but let’s talk concretely about what’s happening to your body and how you can get out of this.

What can happen if you overdo it?

- Gaming beyond your limits isn’t just about being tired. Your body is sending you warning signals that you’re ignoring:
- Dopamine system: Games provide cheap and fast dopamine. If you play nonstop, your brain stops responding to smaller pleasures (like going for a walk or having a conversation). That’s why nothing else feels enjoyable anymore.
- Physical health: Headaches can be a sign of oxygen deprivation, tension in your neck muscles, or eye strain. Ignoring them can lead to chronic migraines and spinal problems.
- Relationships and mental health: Social isolation is a direct path toward depressive states. You’ve already lost your girlfriend — that’s a high price to pay for virtual achievements.

How can you start regaining control?

You don’t have to throw your computer out the window immediately, but you do need a hard reset.

1. “The real-life-first rule”: Set strict hours when your computer stays off. For example: no gaming before 6 p.m. and mandatory shutdown at 10 p.m.
2. Dopamine detox: Try taking a complete 2–3 day break. You’ll feel restless and irritated, but your brain needs time to cool down so you can start “feeling” anything beyond the screen again.
3. Repair relationships: Go to your parents and say: “Listen, I know I’ve been overdoing gaming and I want to change it. Will you help me?” That sentence has almost magical power — your parents will feel noticed, and you’ll gain support instead of arguments.
4. Keep your hands busy with something else: If you game because you don’t know what else to do with your time, find anything offline (gym, biking, even just going for a walk without your phone). You physically need to leave the room where you game.

When is it worth talking to a specialist?

If you feel that despite wanting to stop, you physically can’t (for example you experience anxiety, aggression, or trembling when you’re not gaming), this may be a behavioral addiction. There’s nothing embarrassing about it — addiction therapists work with these issues every day.

Important note: The fact that you lost your girlfriend and your bank account is empty are clear signs that the balance of gains and losses is strongly negative. Games are supposed to be fun, not destroy your life.

Do you want me to help you create a simple daily plan that would let you gradually reduce your screen time without cutting gaming out completely right away?

### **ChatGPT**

Hey. Thanks for writing this — seriously, it’s not easy to admit something like that. And I’ll say it directly: what you’re describing sounds like a real problem, not “laziness” or a “bad personality.”

Can something happen if you overdo gaming?

Short answer: yes, it can — and some of it already seems to be happening to you.

From what you wrote, there are several strong warning signs:

⏱️ losing track of time (you play and suddenly several hours disappear)

🧠 gaming despite headaches and exhaustion

🛑 being unable to stop even when you want to

💔 relationships falling apart (girlfriend, parents)

💸 no money and no other activities

These are classic signs of behavioral addiction (meaning addiction not to a substance, but to an activity — like gaming).

What could get worse if nothing changes?

I’m not trying to scare you, I’m just being honest:

- bigger problems with concentration and sleep
- more frustration, anxiety, and low mood
- further distancing yourself from people
- increasing difficulty returning to “normal” life (work, school, money)

The good news is that this is reversible, especially since you already recognize it.

What can you do RIGHT NOW (real things, not motivational bullshit)

1️⃣ Don’t try “zero gaming starting tomorrow”

That almost always ends in failure.
Instead:

- set a strict limit (e.g., 2–3 hours a day)
- use a phone alarm → when it rings, YOU TURN THE GAME OFF, even if it sucks

At first it’ll be frustrating. That’s normal.

2️⃣ Remove “endless gaming”

- no more “just one more round”
- play only during specific hours
- no gaming at night

3️⃣ One small thing instead of gaming

Not “change your whole life,” just:

- a 20-minute walk
- a quick workout at home
- going to the store, whatever

The point is to interrupt the pattern, not become super fit.

4️⃣ Talk to an adult (seriously)

It doesn’t have to be your parents right away.
But maybe:

- a psychologist (public healthcare is possible too)
- a school counselor
- your family doctor (they can refer you further)

Gaming addiction isn’t something shameful — it’s a medical/psychological issue.

5️⃣ With your parents, one sentence is enough

You don’t need to explain yourself for an hour. Try something like:

“I know I’ve been overdoing gaming and I can’t manage it on my own. I want to do something about it, but I need help.”

That changes the story from “you don’t care about them” to “you’re trying to fight this.”

Important: the fact that you still want to play despite pain and consequences does not mean you’re weak.

It means your brain has become used to dopamine from gaming. This can be reversed, but not through willpower alone — it takes structure and support.

If you want, we can:

- create a realistic plan to reduce gaming
- figure out how to talk to your parents
- or check whether this already qualifies as addiction or not

You’re not alone in this. Really.
